# Supplementary material
Source: ML conference proceedings conference paper supplement (https://www.ecva.net/papers/eccv_2022/papers_ECCV/html/136760697_ECCV_2022_paper.php)
Supplement: Supplementary file 1 [file 136760697-supp.pdf]

# NÜWA: Visual Synthesis Pre-training for Neural visUal World creAtion

Chenfei Wu<sup>1\*</sup> Jian Liang<sup>2\*</sup> Lei Ji<sup>1</sup> Fan Yang<sup>1</sup> Yuejian Fang<sup>2†</sup>  
Daxin Jiang<sup>1</sup> Nan Duan<sup>1†</sup>

<sup>1</sup> Microsoft Research Asia      <sup>2</sup> Peking University

A wooden house sitting in a field.

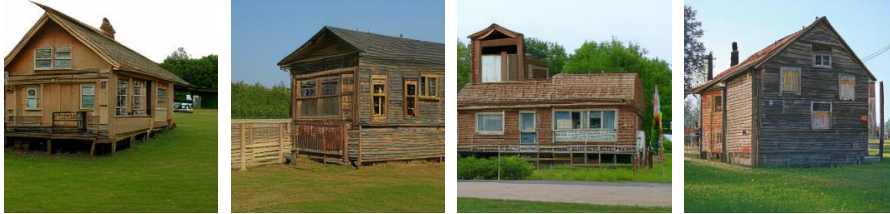

A young girl eating a very tasty looking slice of pizza.

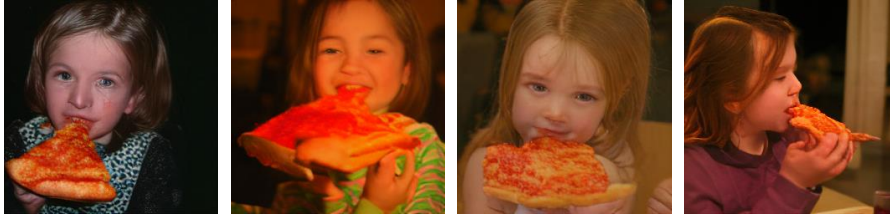

Walnuts are being cut on a wooden cutting board.

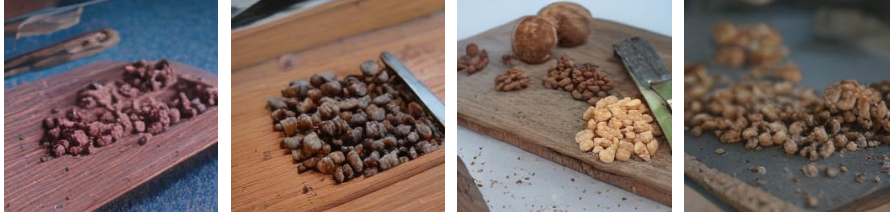

A boy with a hat wearing a tie.

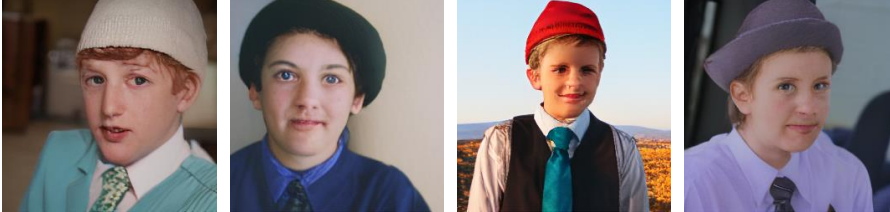

**Fig. 1:** More samples of Text-to-Image (T2I) task generated by NÜWA.

\* Both authors contributed equally to this research. † Corresponding author.

Some birds are standing on top of a wooden bench.

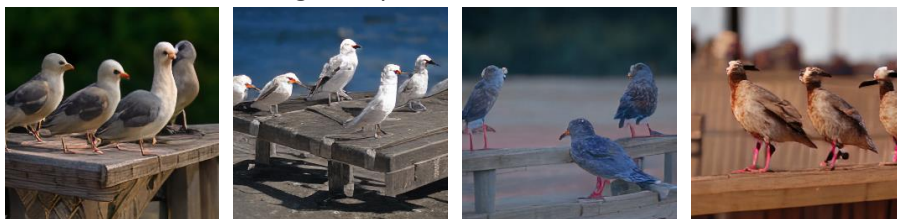

A dog wearing a Santa Claus hat is lying in bed.

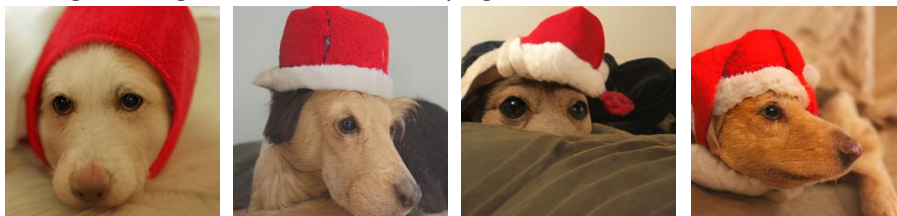

A child is sitting in front of a cake with candles.

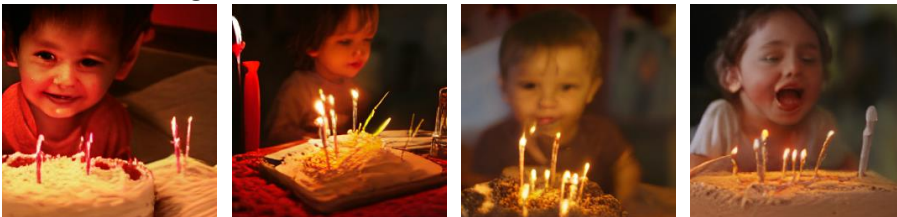

A bowl of food with meat in a sauce, broccoli and cucumbers.

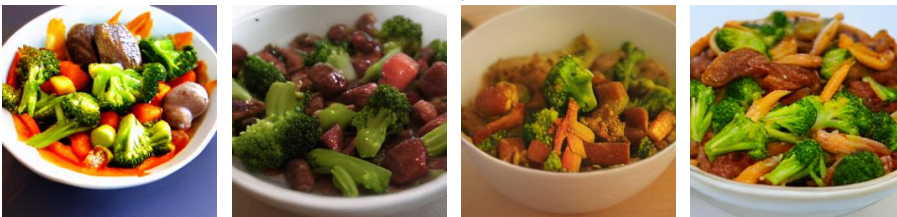

**Fig. 2:** More samples of Text-to-Image (T2I) task generated by NÜWA.

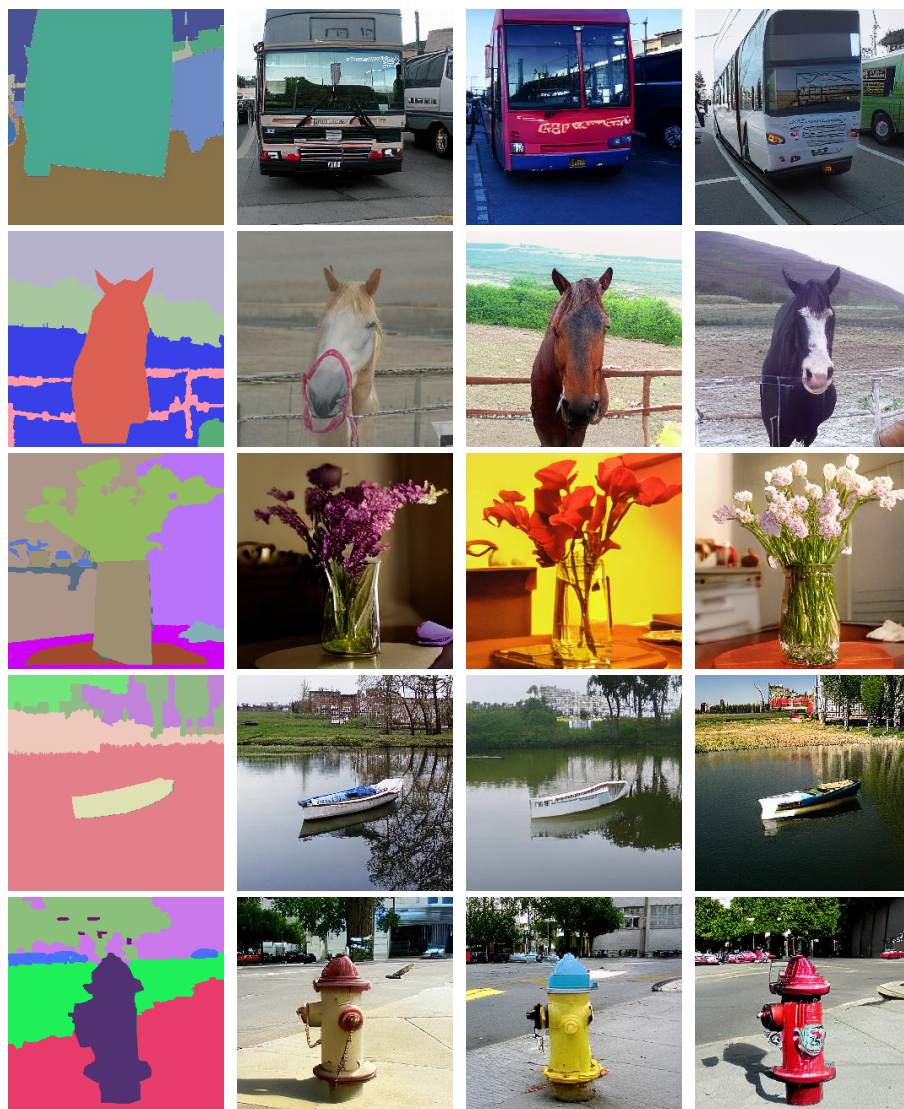

**Fig. 3:** More samples of Sketch-to-Image (S2I) task generated by NÜWA.



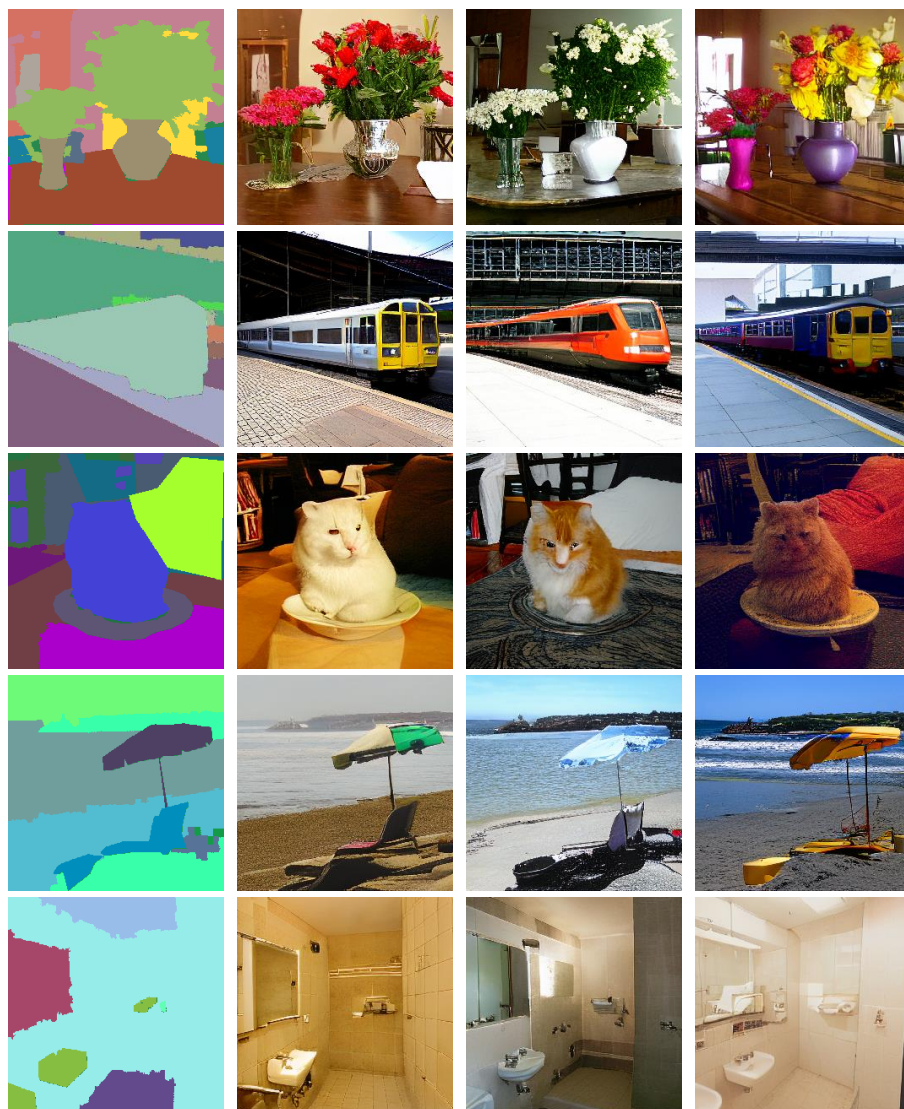

**Fig. 4:** More samples of Sketch-to-Image (S2I) task generated by NÜWA.

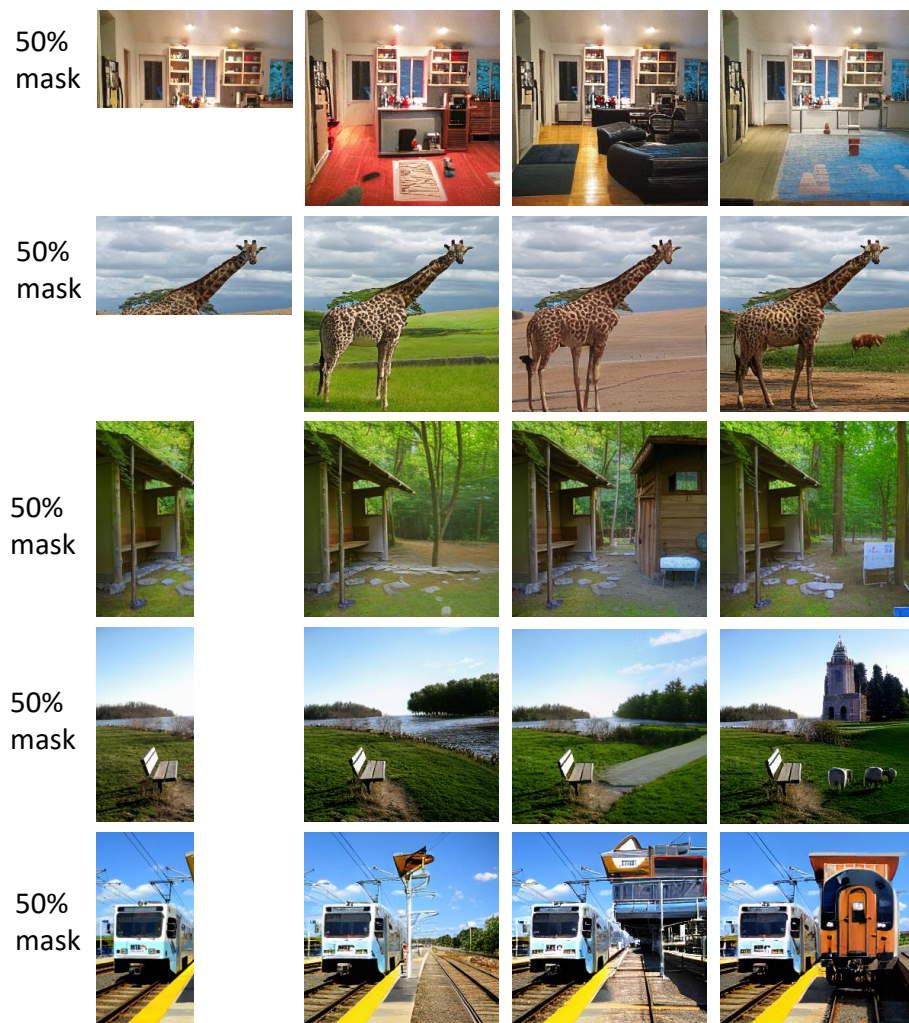

Fig. 5: More samples of the Image Completion (I2I) task generated by NÜWA.

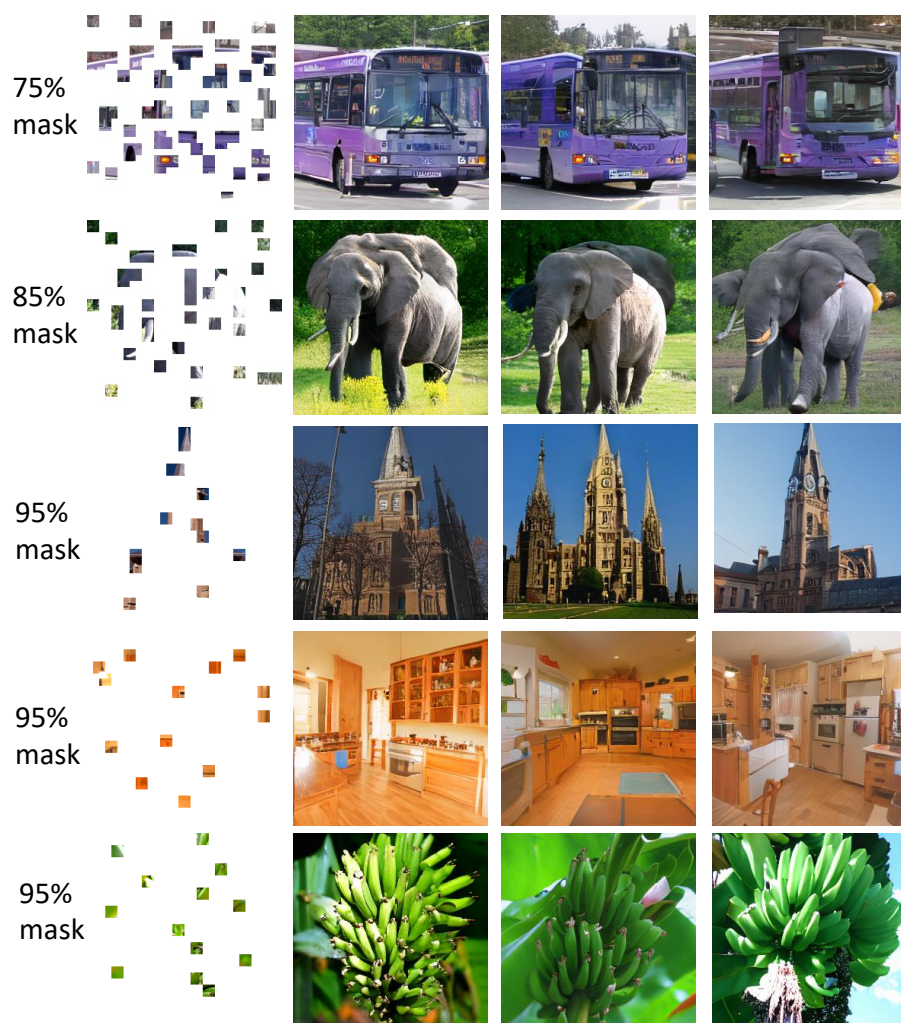

**Fig. 6:** More samples of the Image Completion (I2I) task generated by NÜWA.



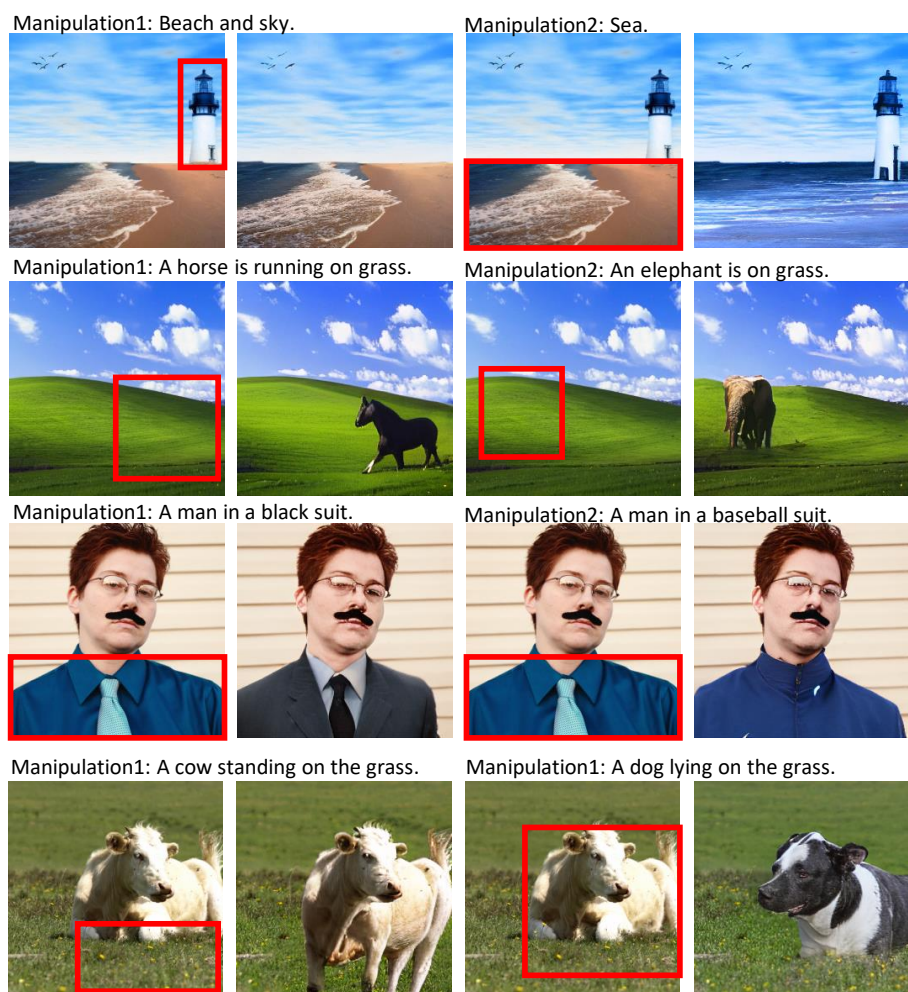

**Fig. 7:** More samples of the Text-Guided Image Manipulation(TI2I) task generated by NÜWA.

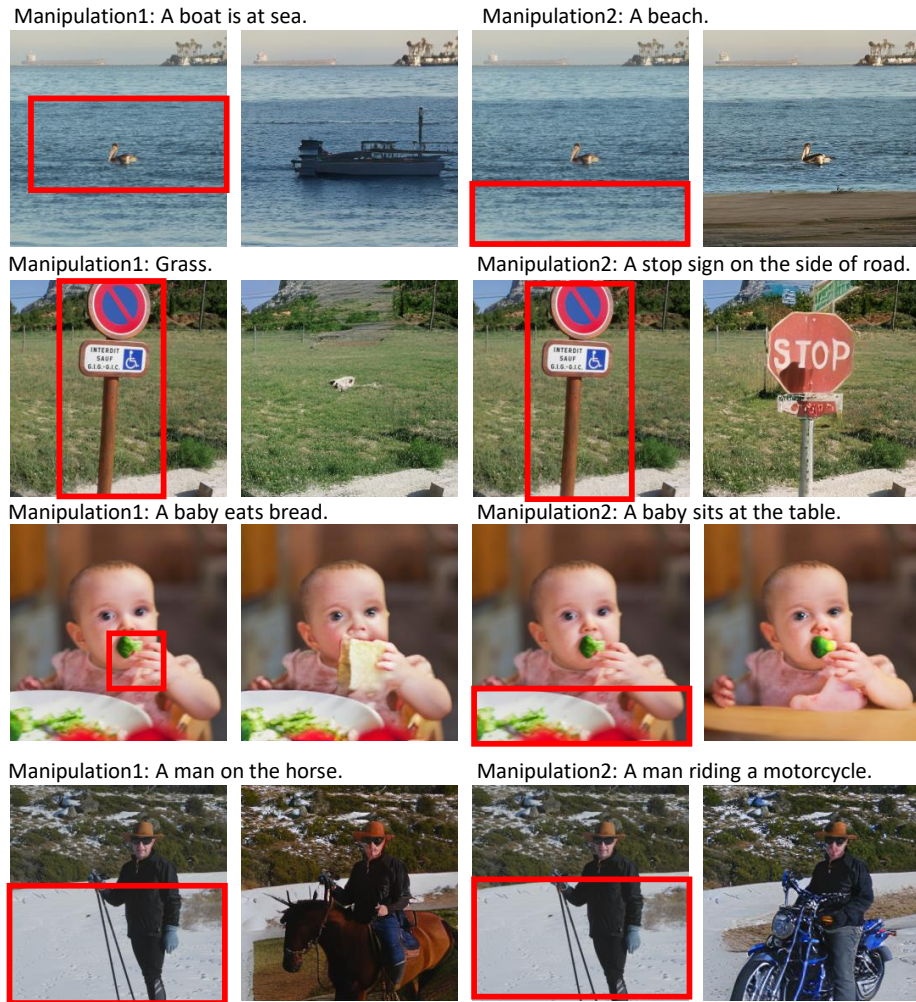

**Fig. 8:** More samples of the Text-Guided Image Manipulation(TI2I) task generated by NUWA.



Play golf on grass.

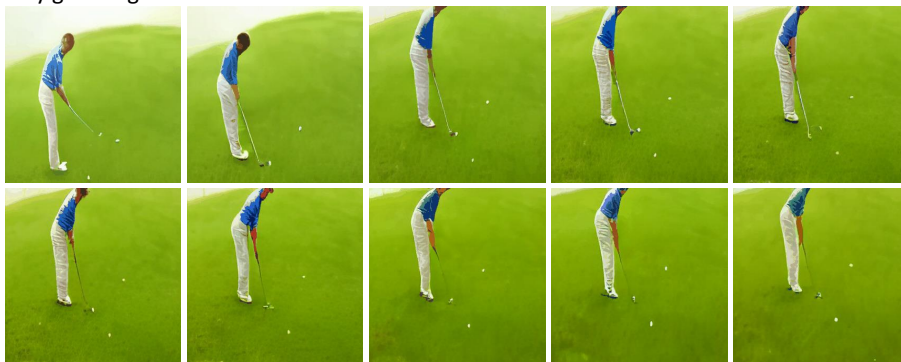

Play golf at swimming pool.

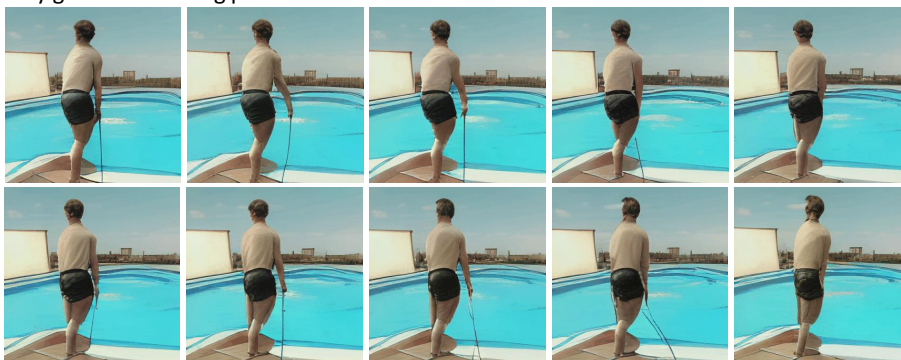

Running on the sea.

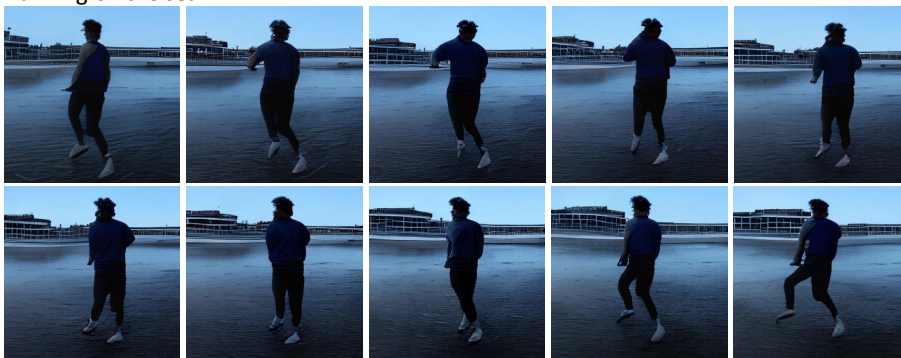

**Fig. 9:** More samples of the Text-to-Video (T2V) task generated by NÜWA.

A suit man is talking from a studio with fun.

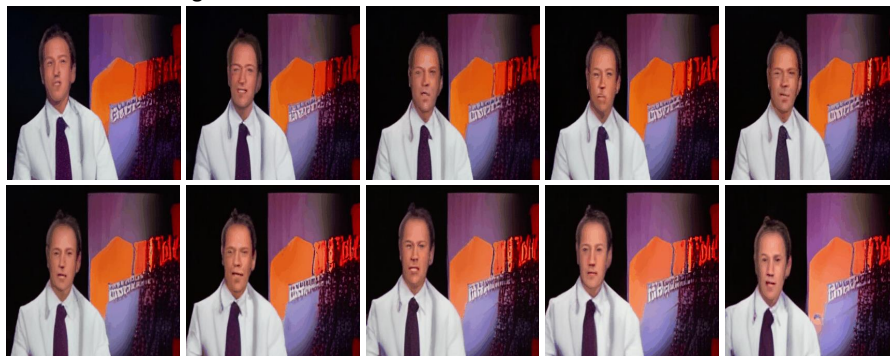

The white sailboat sailed on the sea.

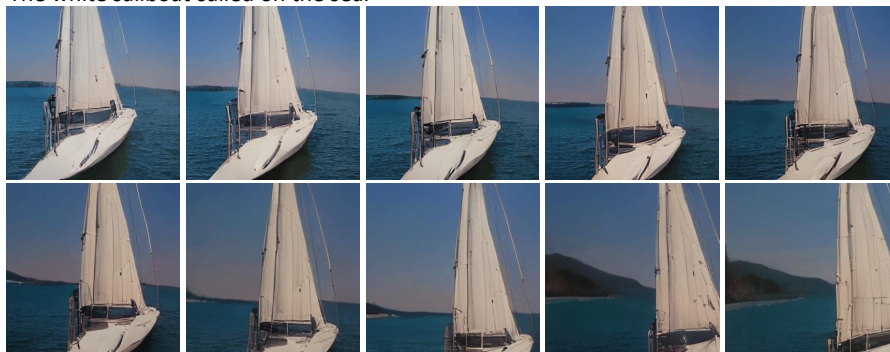

A man is folding a piece of yellow paper.

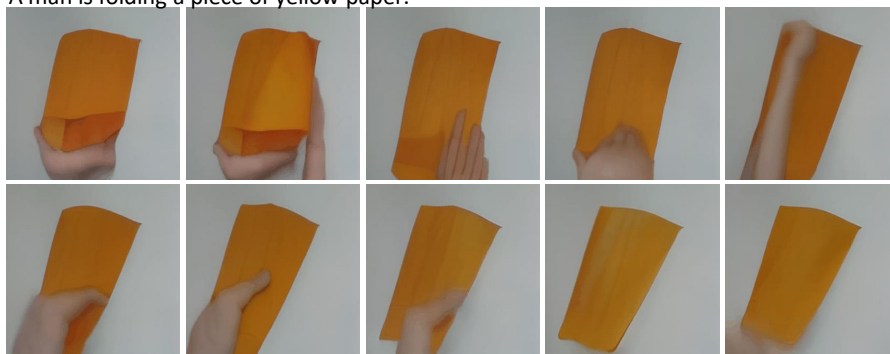

**Fig. 10:** More samples of the Text-to-Video (T2V) task generated by NÜWA.

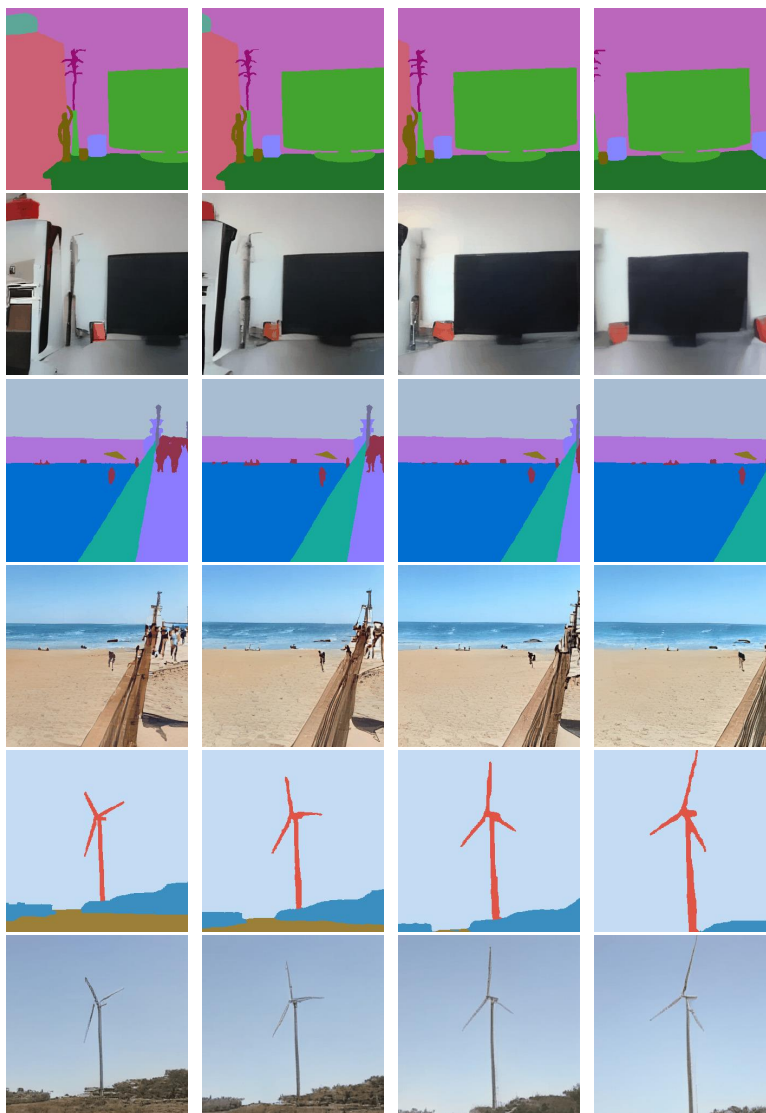

**Fig. 11:** More samples of Sketch-to-Video (S2V) task generated by NÜWA.



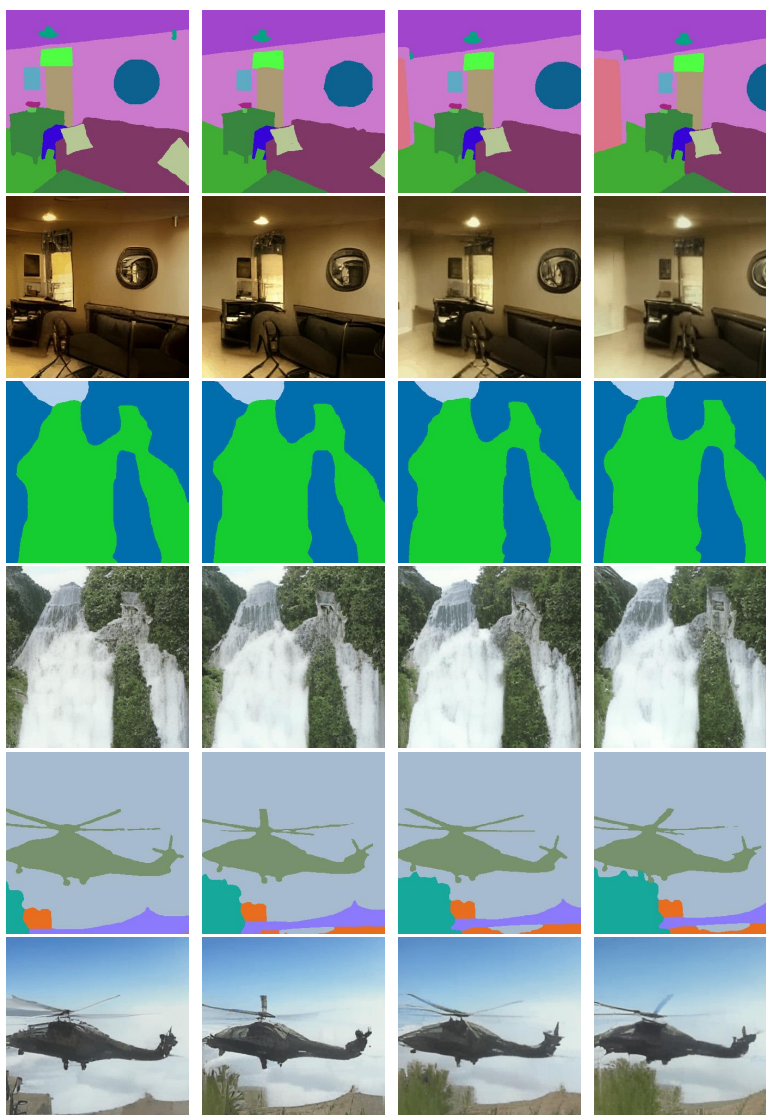

**Fig. 12:** More samples of Sketch-to-Video (S2V) task generated by NÜWA.

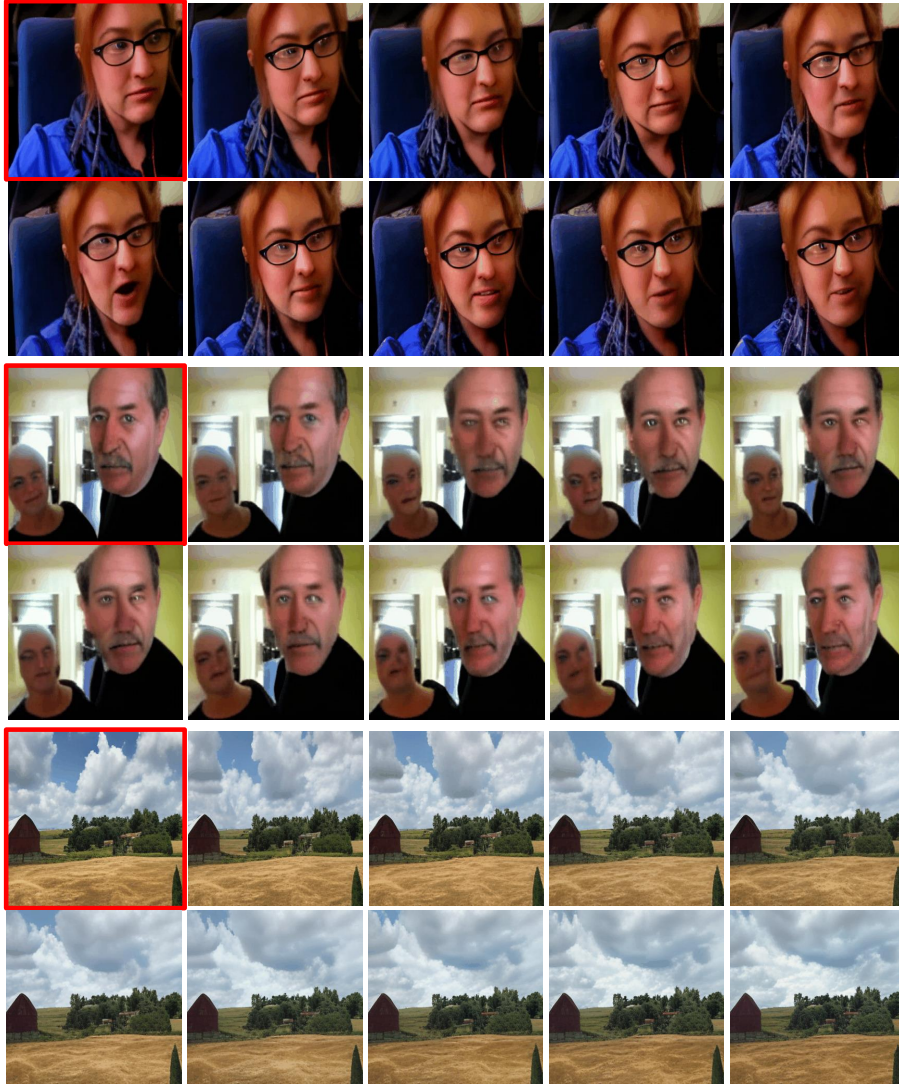

**Fig. 13:** More samples of the Video Prediction (V2V) task generated by NÜWA. Only one frame (see red box) is used as condition.

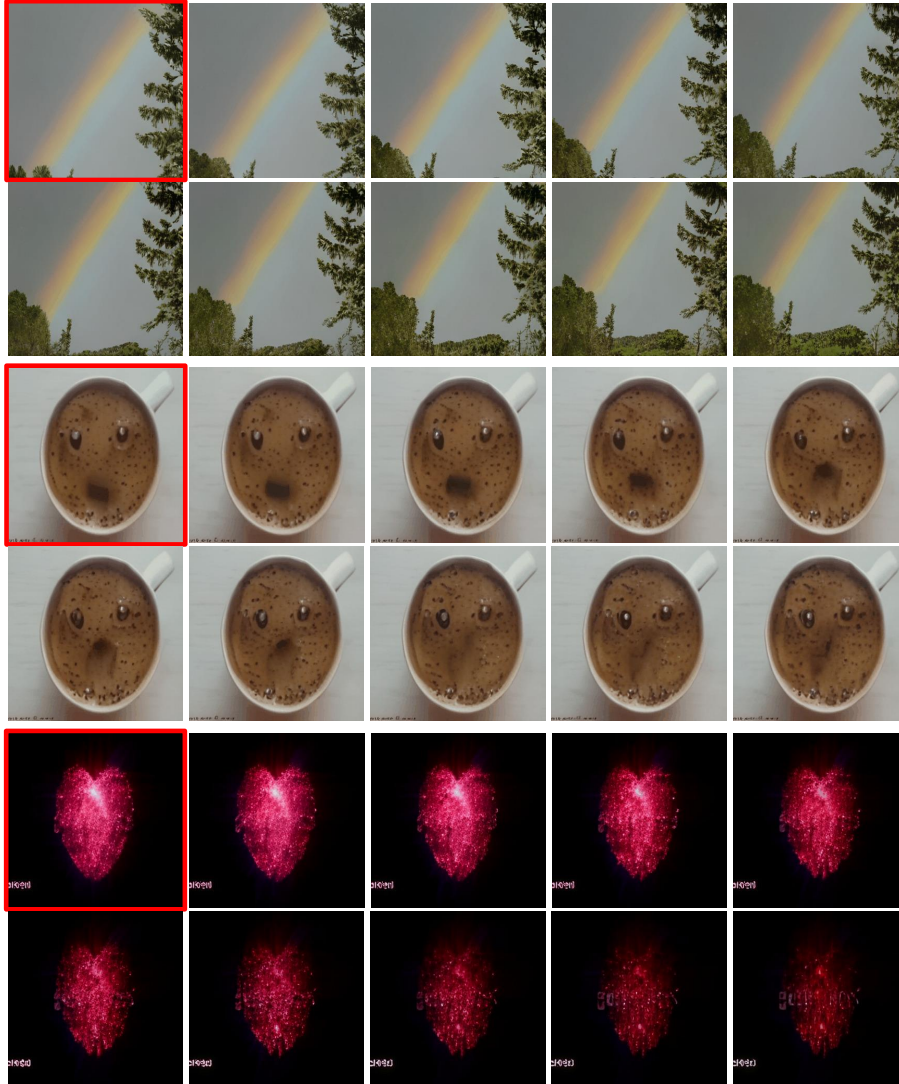

**Fig. 14:** More samples of the Video Prediction (V2V) task generated by NÜWA. Only one frame (see red box) is used as condition.



Raw Video:

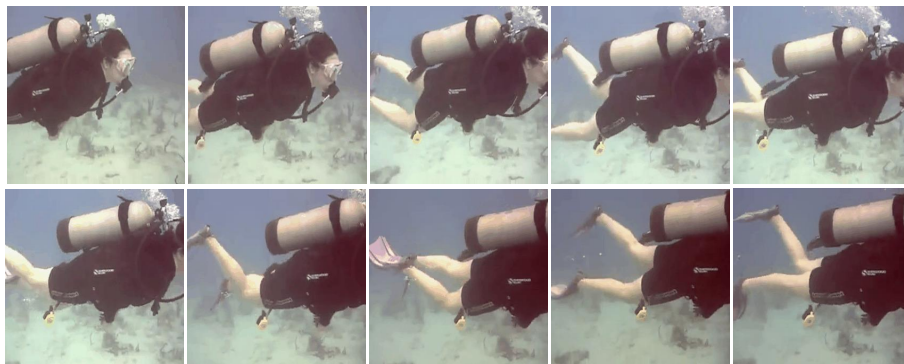

Manipulation1: The diver is swimming to the surface.

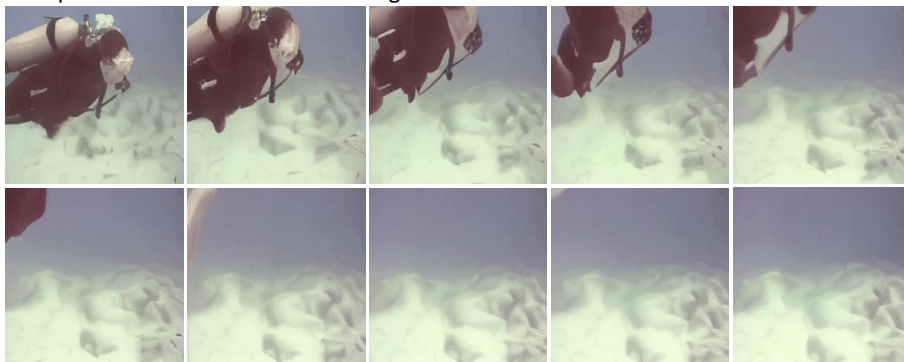

**Fig. 15:** More samples of Text-Guided Video Manipulation (TV2V) task generated by NÜWA.

Manipulation2: The diver is swimming to the bottom.

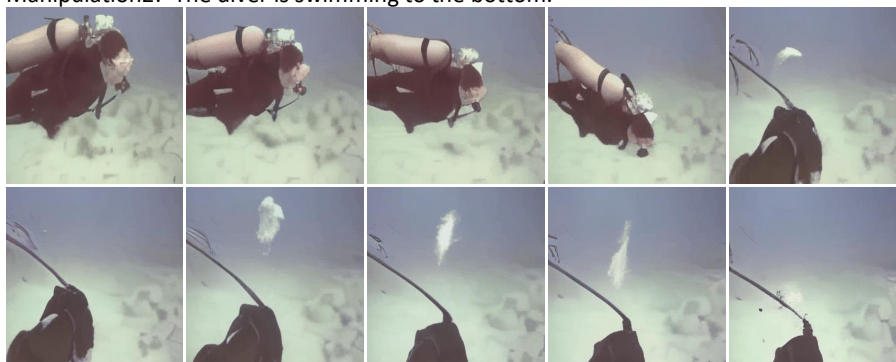

Manipulation3: The diver is flying to the sky.

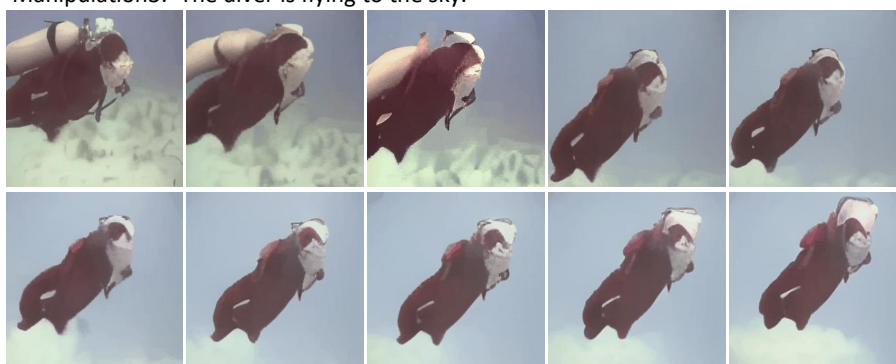

**Fig. 16:** More samples of Text-Guided Video Manipulation (TV2V) task generated by NUWA.
